# Supplementary material for: Synthesis of ring-structured polysiloxane as host materials for blue phosphorescent device
Source: Royal Society of Chemistry journal article supplement (doi:10.1039/c1jm10290g), 2011-01-01
Supplement: c1jm10290g.pdf [file c1jm10290g.pdf]

## Supporting Information

### Supporting Figures

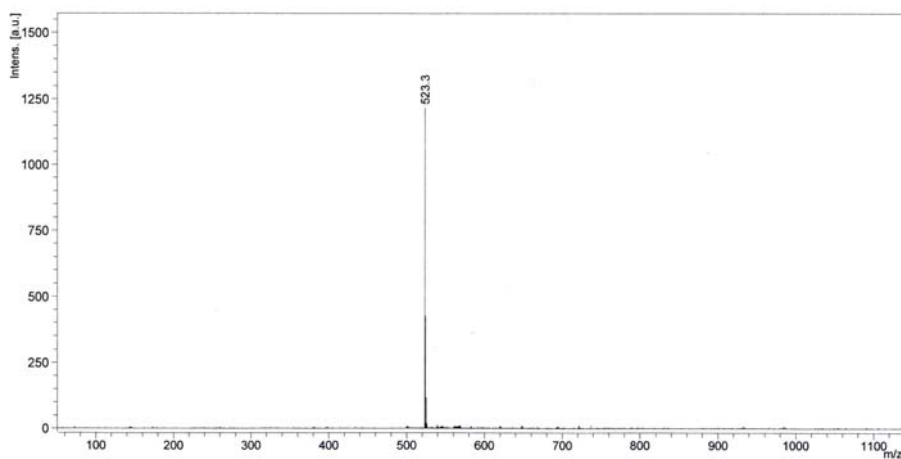

Figure S1. MALDI-TOF MS of  $M_1$

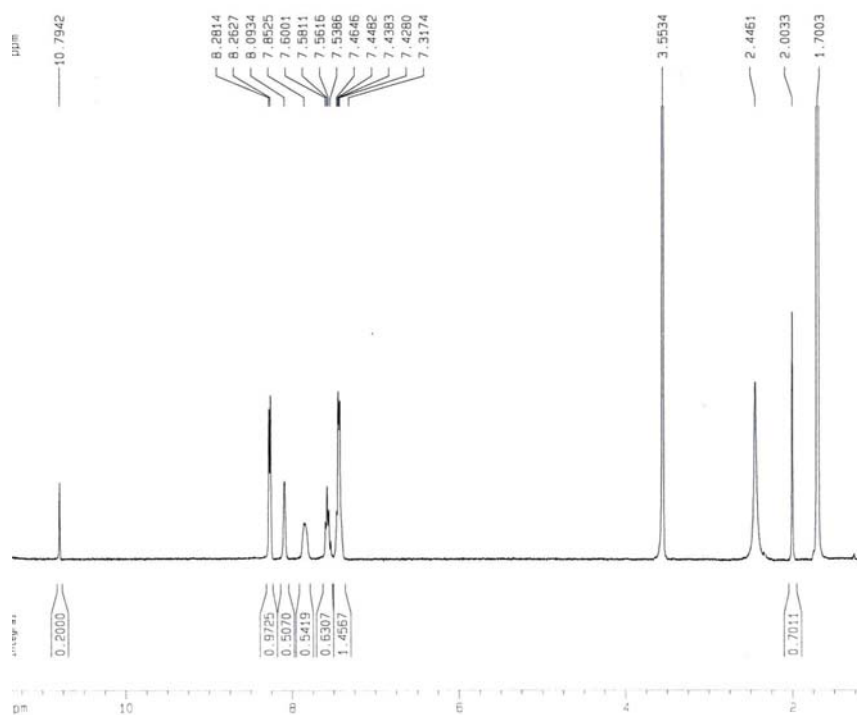

Figure S2.  $^1\text{H}$ NMR of  $M_1$

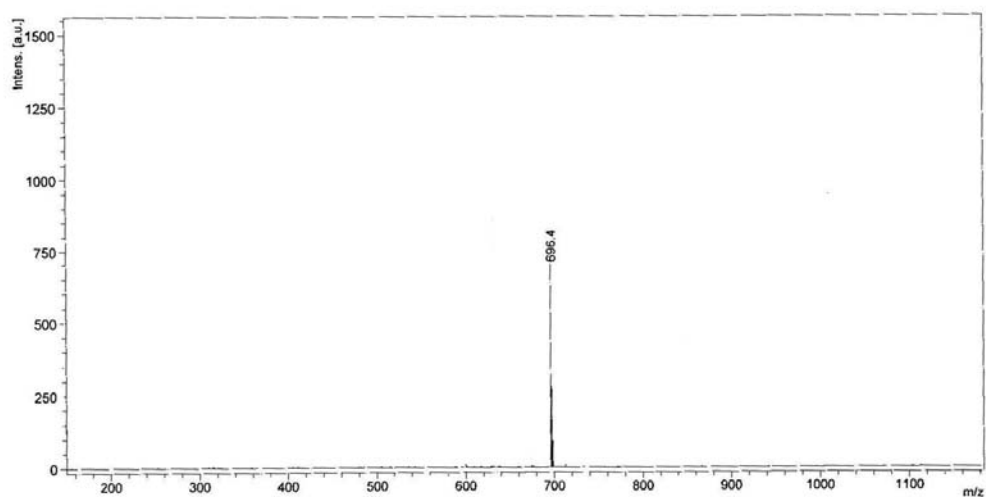

Figure S3. MALDI-TOF MS of  $M_2$

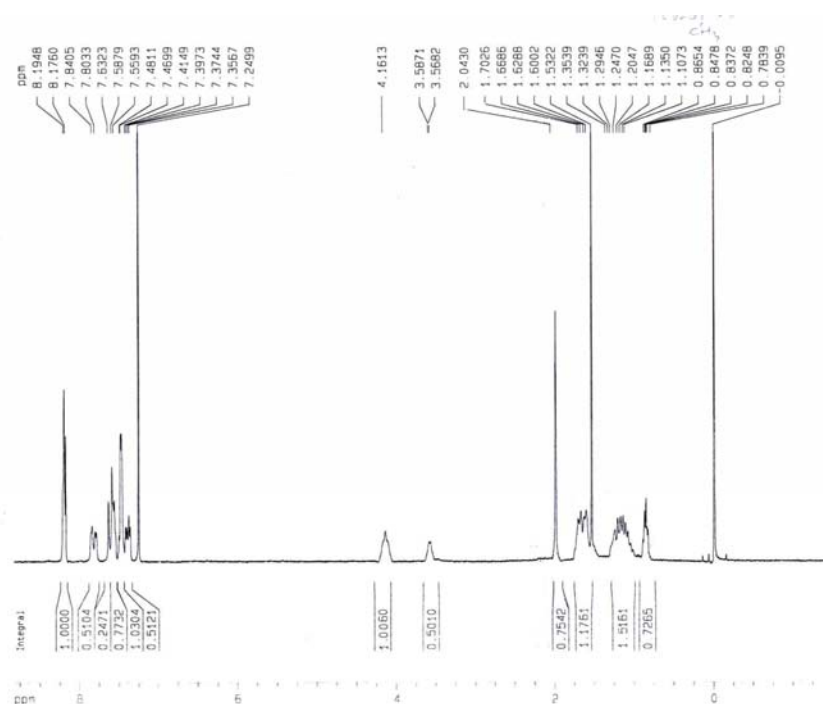

Figure S4.  $^1\text{H}$  NMR of  $M_2$

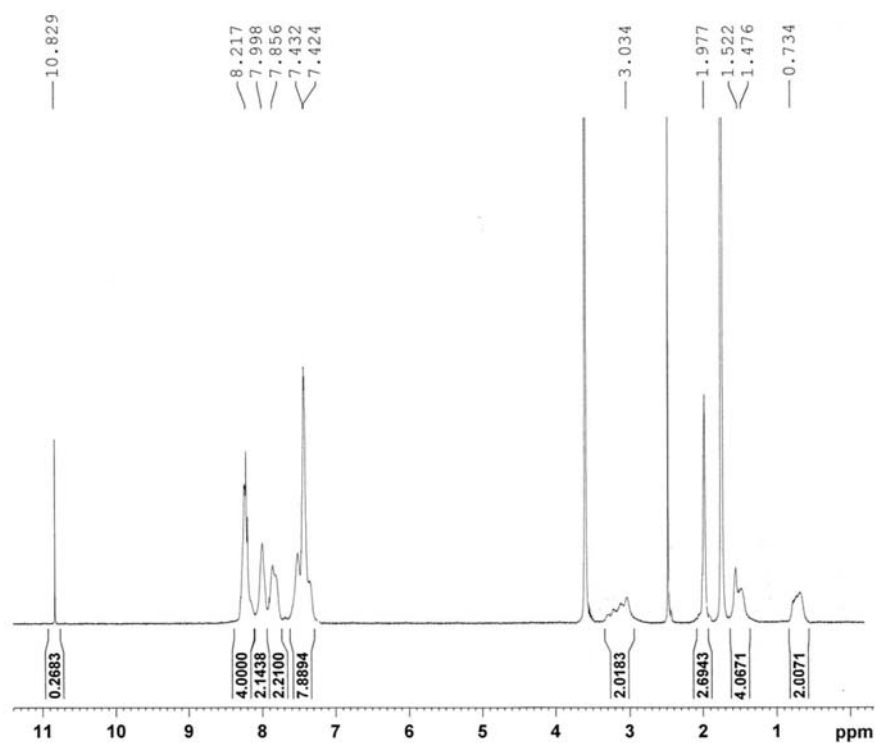

Figure S5. <sup>1</sup>H NMR of BS-PSQ

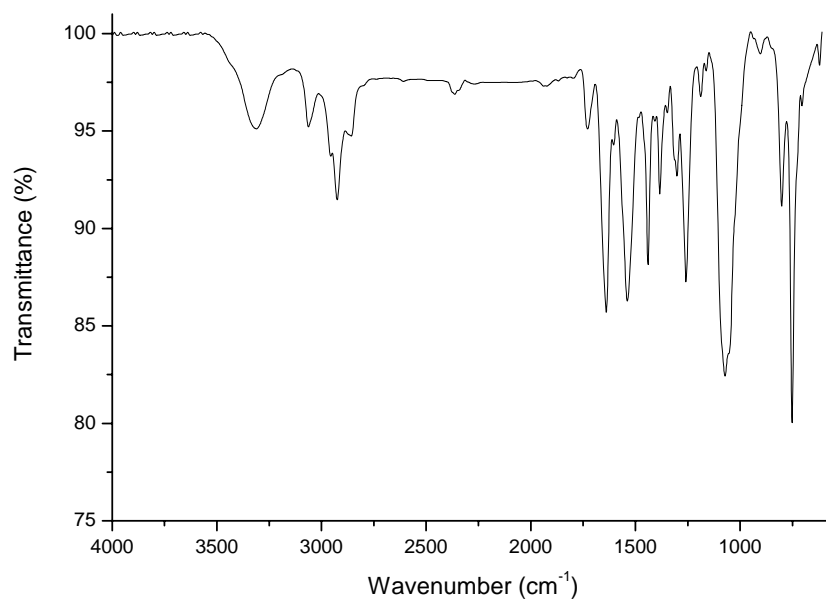

Figure S6. IR Spectrum of BS-PSQ

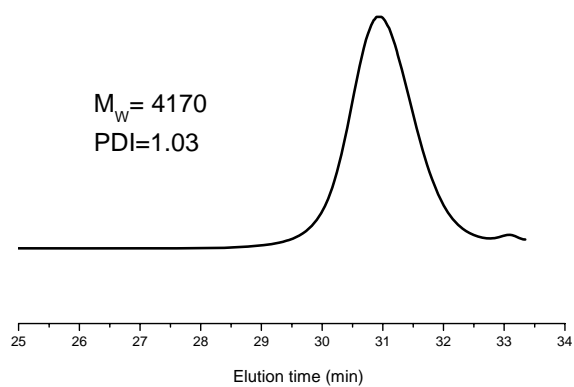

Figure S7. GPC of BS-PSQ
